# Supplementary material for: Ni-Ci oxygen evolution catalyst integrated BiVO4 photoanodes for solar induced water oxidation
Source: Royal Society of Chemistry journal article supplement (doi:10.1039/c5ra07262j), 2015-01-01
Supplement: c5ra07262j1.pdf [file c5ra07262j1.pdf]

## Supporting Information

### Efficient and Stable Solar Induced Water Oxidation by a BiVO<sub>4</sub> Photoanode Integrated With Ni-Ci Oxygen Evolution Catalyst

Satyananda Kishore Pilli,\* Kodi Summers and Dev Chidambaram\*

Chemical and Materials Engineering Department, University of Nevada, Reno, Reno, NV 89557, United States

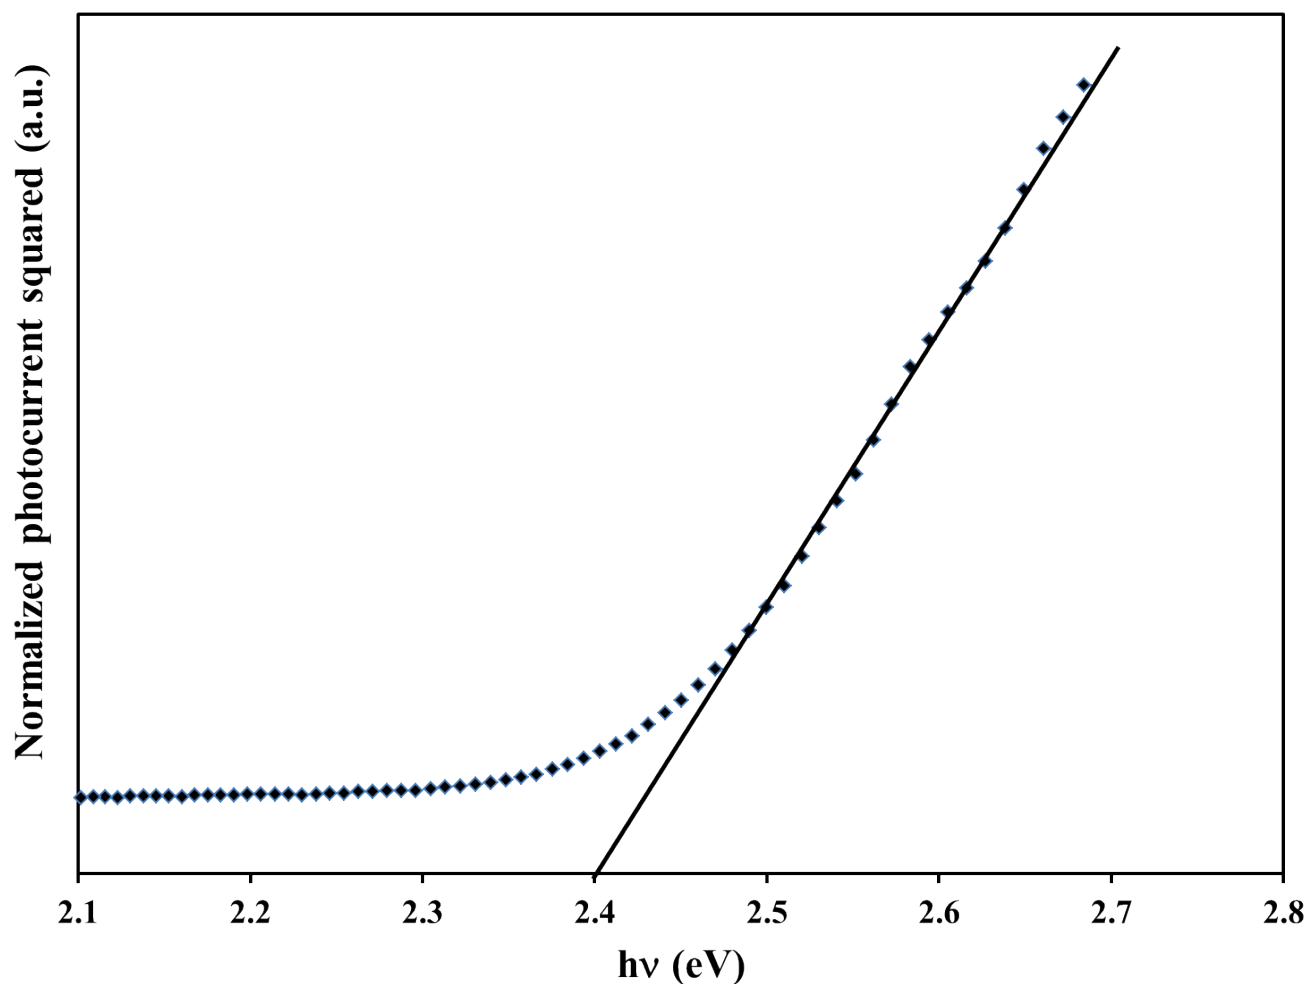

**Figure S1.** Photocurrent action spectrum of BiV<sub>0.98</sub>W<sub>0.01</sub>O<sub>4</sub> photoelectrode measured in 1mM Na<sub>2</sub>SO<sub>3</sub> aqueous solution (pH7 phosphate buffered), applied bias 0.7 V vs. Ag/AgCl.

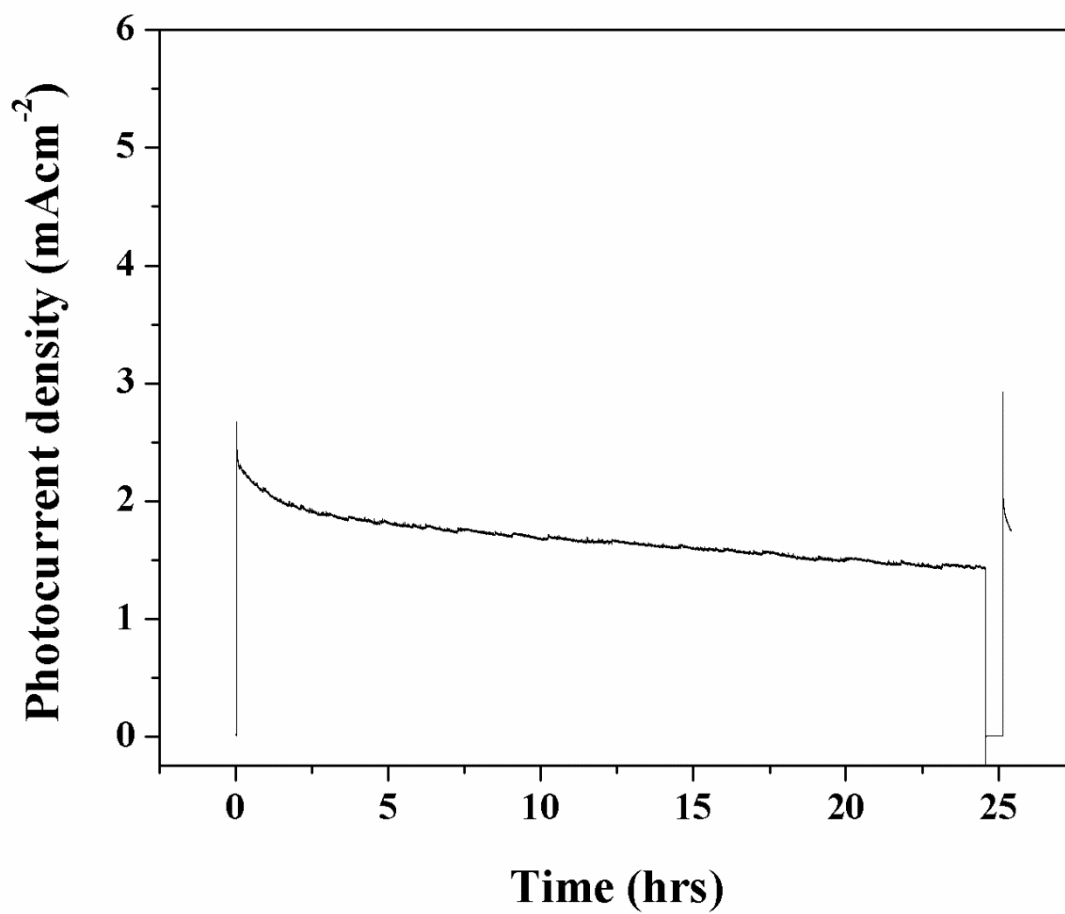

**Figure S2.** Photocurrent-time response profile of BiV<sub>0.98</sub>W<sub>0.01</sub>O<sub>4</sub>/FTO photoelectrode measured at 0.6 V vs. Ag/AgCl under AM 1.5 G irradiation (100 mW cm<sup>-2</sup>).
